# Supplementary material for: The impact of visuospatial cues on human spatial perception abilities
Source: Research Square preprint supplement (doi:10.21203/rs.3.rs-3877452/v1), 2024-01-23
Supplement: Supplementary file 1 [file 5d8952c18d35e998f203e6f2.docx]

**Supplementary**

*Table S1. Friedman test results for absolute error ratio mean in DP test*

| N | 100 |
| --- | --- |
| Chi-Square | .740 |
| df | 2 |
| p-value | .691 |

*Table S2. Friedman test results for absolute error ratio mean in SP test*

| N | 100 |
| --- | --- |
| Chi-Square | 9.500 |
| df | 2 |
| p-value | .009 |

*Table S3. Sign test results for absolute error ratio mean in SP test*

|  | | N |
| --- | --- | --- |
| Absolute error ratio means for EG1 - Absolute error ratio means for CG | Negative Differences | 37 |
| Positive Differences | 63 |
| Ties | 0 |
| Total | 100 |
| Absolute error ratio means for EG2 - Absolute error ratio means for EG1 | Negative Differences | 62 |
| Positive Differences | 38 |
| Ties | 0 |
| Total | 100 |
| Absolute error ratio means for EG2 - Absolute error ratio means for CG | Negative Differences | 53 |
| Positive Differences | 47 |
| Ties | 0 |
| Total | 100 |

*Table S4. Friedman test results for time response in DP test*

| N | 100 |
| --- | --- |
| Chi-Square | 1.940 |
| df | 2 |
| p-value | .379 |

*Table S5. Friedman test results for time response in SP test*

| N | 100 |
| --- | --- |
| Chi-Square | 6.020 |
| df | 2 |
| p-value | .049 |

*Table S6. U Sign test results for response time in SP test*

|  | Response time for SP Mars - Response time for SP CG | Response time for SP Space - Response time for SP EG1 | Response time for SP Space - Response time for SP EG2 |
| --- | --- | --- | --- |
| Z | -.700 | -2.900 | -.900 |
| p-value | .484 | .004 | .368 |

*Table S7. Sign test results for response time in SP test*

|  | | N |
| --- | --- | --- |
| Response time for SP EG1- Response time for SP CG | Negative Differences | 54 |
| Positive Differences | 46 |
| Ties | 0 |
| Total | 100 |
| Response time for SP EG2 - Response time for SP EG1 | Negative Differences | 65 |
| Positive Differences | 35 |
| Ties | 0 |
| Total | 100 |
| Response time for SP EG2 - Response time for SP CG | Negative Differences | 55 |
| Positive Differences | 45 |
| Ties | 0 |
| Total | 100 |

*Table S8. Test of normality for absolute error ratio mean in DP test*

|  | Gender | Shapiro-Wilk | | |
| --- | --- | --- | --- | --- |
| Statistic | df | p-value |
| Absolute error ratio means for DP CG | Male | .975 | 74 | .148 |
| Female | .914 | 26 | .032 |
| Absolute error ratio means for DP EG1 | Male | .974 | 74 | .132 |
| Female | .978 | 26 | .823 |
| Absolute error ratio means for DP EG2 | Male | .980 | 74 | .288 |
| Female | .973 | 26 | .714 |

*Table S9. Test of homogeneity of variances (parametric) for absolute error ratio mean in DP test*

|  | | Sum of Squares | df | Mean Square | F | p-value |
| --- | --- | --- | --- | --- | --- | --- |
| Absolute error ratio means for DP EG1 | Between Groups | .014 | 1 | .014 | 4.814 | .031 |
| Within Groups | .287 | 98 | .003 |  |  |
| Total | .301 | 99 |  |  |  |
| Absolute error ratio means for DP EG2 | Between Groups | .012 | 1 | .012 | 3.799 | .054 |
| Within Groups | .319 | 98 | .003 |  |  |
| Total | .331 | 99 |  |  |  |

*Table S10. Point-biserial correlation for absolute error ratio mean in DP test and gender*

|  | | Absolute error ratio means for DP Space | Gender |
| --- | --- | --- | --- |
| Absolute error ratio means for DP EG2 | Pearson Correlation | 1 | .193 |
| p-value |  | .054 |
| N | 100 | 100 |
| Gender | Pearson Correlation | .193 | 1 |
| p-value | .054 |  |
| N | 100 | 100 |

*Table S11. Point-biserial correlation for absolute error ratio mean in DP test and gender*

|  | | Absolute error ratio means for DP Space | Gender |
| --- | --- | --- | --- |
| Absolute error ratio means for DP EG2 | Pearson Correlation | 1 | .193 |
| p-value |  | .054 |
| N | 100 | 100 |
| Gender | Pearson Correlation | .193 | 1 |
| p-value | .054 |  |
| N | 100 | 100 |

*Table S12. Test of homogeneity of variances (non-parametric) for absolute error ratio mean in DP test*

| Individual Difference |  | Sum of Squares | df | Mean Square | F | p-value |
| --- | --- | --- | --- | --- | --- | --- |
| DP CG | Between Groups | 198.832 | 1 | 198.832 | 1.045 | .309 |
| Within Groups | 18638.891 | 98 | 190.193 |  |  |
| Total | 18837.723 | 99 |  |  |  |
| DP EG1 | Between Groups | 54.618 | 1 | 54.618 | .267 | .606 |
| Within Groups | 20031.090 | 98 | 204.399 |  |  |
| Total | 20085.709 | 99 |  |  |  |

*Table S13. Mann-Whitney U test results for absolute error ratio mean in DP test*

|  | Absolute error ratio means for | |
| --- | --- | --- |
| DP CG | DP EG1 |
| Mann-Whitney U | 733.000 | 688.000 |
| Z | -1.800 | -2.153 |
| p-value | .072 | .031 |


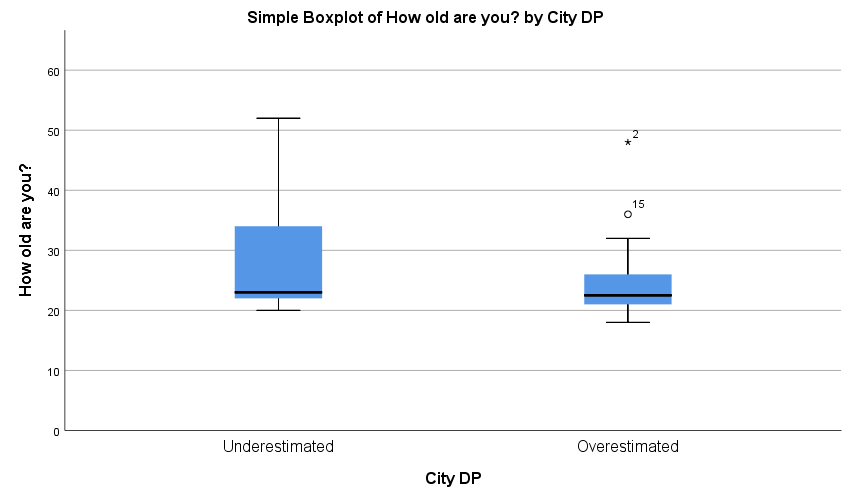


*Figure S1. Boxplots for each category in the DP test under CG circumstances.*


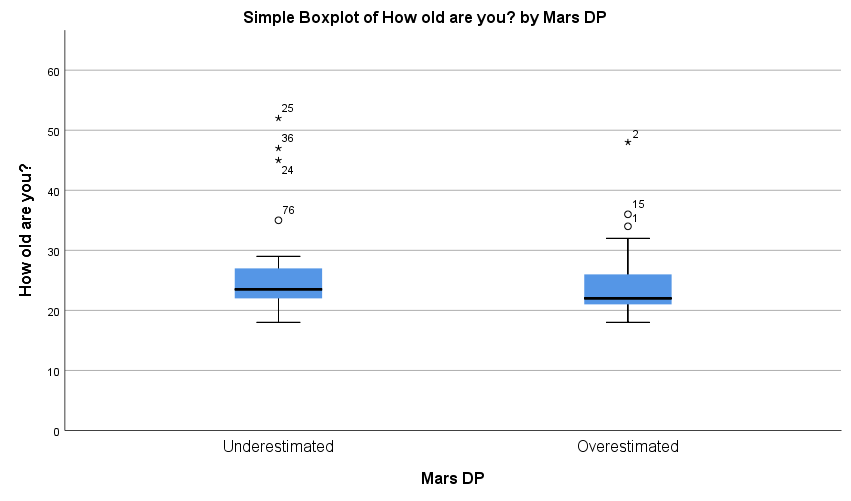


*Figure S2. Boxplots for each category in the DP test under EG1 circumstances.*


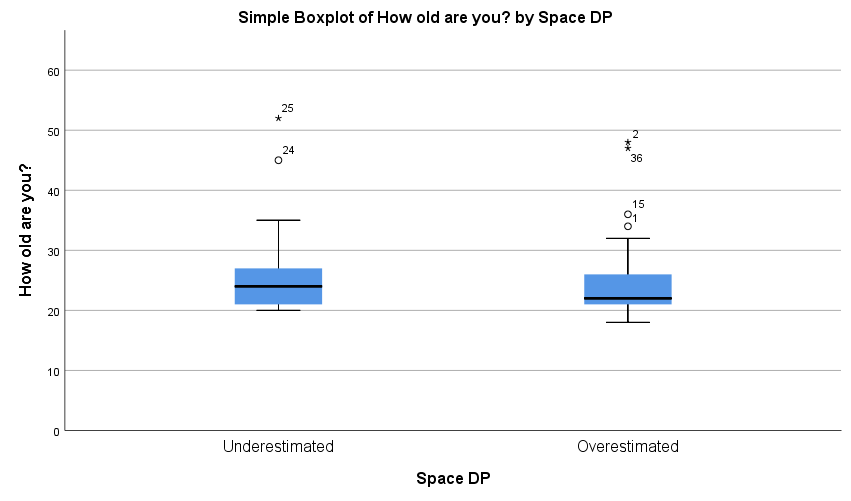


*Figure S3. Boxplots for each category in the DP test under EG2 circumstances*


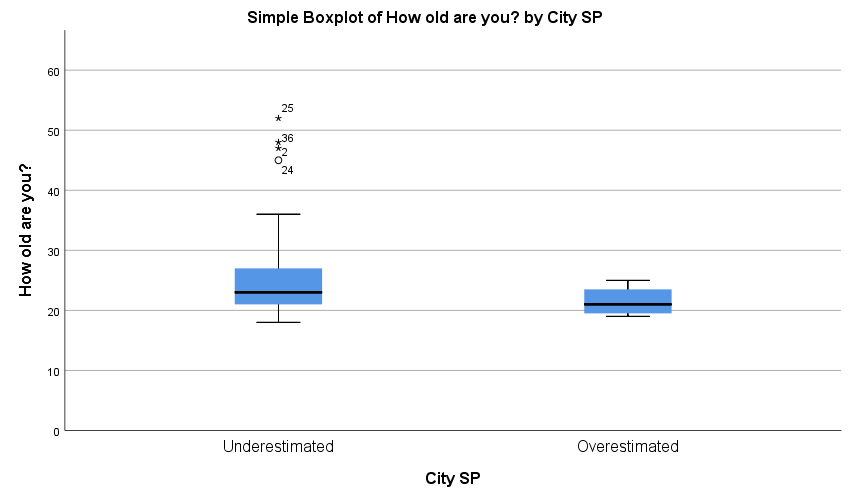


*Figure S4. Boxplots for each category in the SP test under CG circumstances*


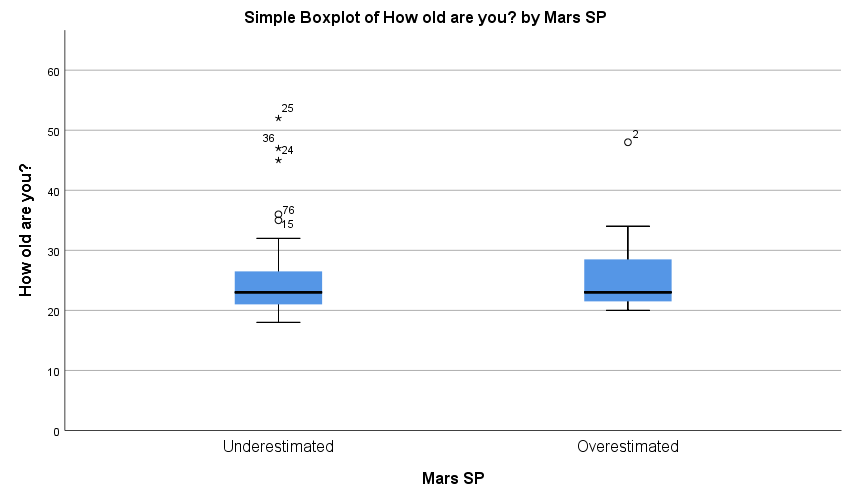


*Figure S5. Boxplots for each category in the SP test under EG1 circumstances*


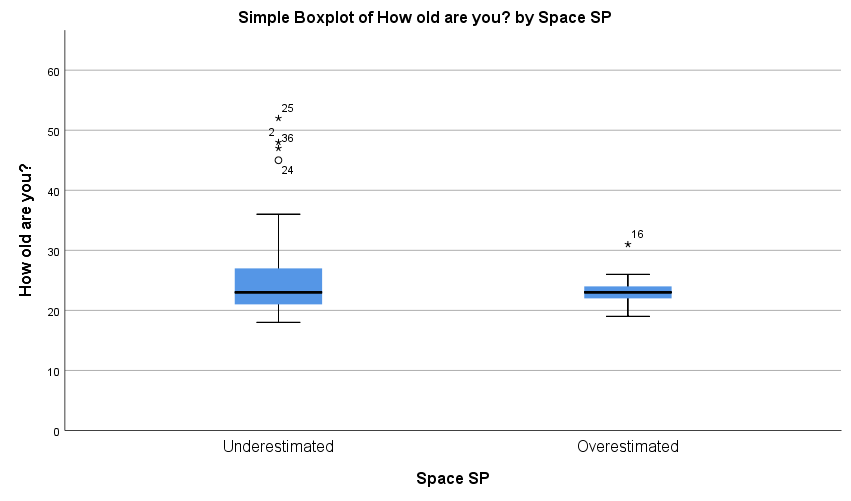


Figure S6. Boxplots for each category in the SP test under EG2 circumstances
